# Supplementary material
Source: HighWire-hosted journal article supplement (https://bmjopen.bmj.com/content/9/5/e028710)
Supplement: inline-supplementary-material-1 [file inline-supplementary-material-1.pdf]

**Supplementary Table 1: Cohort characteristics by jurisdiction**

| Characteristic           |                       | Western Australia |                | England          |                | Scotland       |                |
|--------------------------|-----------------------|-------------------|----------------|------------------|----------------|----------------|----------------|
|                          |                       | n                 | (%)            | n                | (%)            | n              | (%)            |
| Sex <sup>a</sup>         | Male                  | 173,081           | (51.2)         | 3,044,931        | (51.3)         | 359,159        | (51.3)         |
|                          | Female                | 164,828           | (48.8)         | 2,894,078        | (48.7)         | 340,430        | (48.7)         |
| Year of birth            | 2000                  | 22,551            | (6.7)          | -                | -              | 51,479         | (7.4)          |
|                          | 2001                  | 22,461            | (6.7)          | -                | -              | 50,295         | (7.2)          |
|                          | 2002                  | 22,412            | (6.7)          | -                | -              | 49,425         | (7.1)          |
|                          | 2003                  | 22,345            | (6.6)          | 535,724          | (9.0)          | 50,450         | (7.2)          |
|                          | 2004                  | 23,361            | (6.9)          | 551,939          | (9.3)          | 52,417         | (7.5)          |
|                          | 2005                  | 24,776            | (7.3)          | 560,894          | (9.4)          | 52,415         | (7.5)          |
|                          | 2006                  | 26,627            | (7.9)          | 579,220          | (9.8)          | 53,830         | (7.7)          |
|                          | 2007                  | 26,943            | (8.0)          | 586,526          | (9.9)          | 55,765         | (8.0)          |
|                          | 2008                  | 28,216            | (8.4)          | 614,471          | (10.4)         | 57,481         | (8.2)          |
|                          | 2009                  | 28,588            | (8.5)          | 611,427          | (10.3)         | 57,007         | (8.2)          |
|                          | 2010                  | 28,565            | (8.5)          | 629,778          | (10.7)         | 56,586         | (8.1)          |
|                          | 2011                  | 29,535            | (8.7)          | 632,306          | (10.7)         | 56,510         | (8.1)          |
|                          | 2012                  | 31,529            | (9.3)          | 636,724          | (10.7)         | 55,929         | (8.0)          |
| Deprivation <sup>b</sup> | <10% (most deprived)  | 40,936            | (12.1)         | 885,891          | (14.9)         | 85,987         | (12.3)         |
|                          | 10-49%                | 122,309           | (36.2)         | 2,635,562        | (44.4)         | 295,372        | (42.2)         |
|                          | 50-89%                | 131,232           | (38.8)         | 1,957,789        | (33.0)         | 252,407        | (36.1)         |
|                          | ≥90% (least deprived) | 43,432            | (12.9)         | 459,767          | (7.6)          | 65,823         | (9.4)          |
| <b>TOTAL</b>             |                       | <b>337,909</b>    | <b>(100.0)</b> | <b>5,939,009</b> | <b>(100.0)</b> | <b>699,589</b> | <b>(100.0)</b> |

<sup>a</sup> Sex was missing was 7205 children (England) with no missing data from Western Australia or Scotland.

<sup>b</sup> Deprivation scores were missing for 18,920 children (Western Australia), 146,588 (England) and 827 (Scotland).

**Supplementary Table 2: Hospitalisation rate for ARI by diagnostic category by primary diagnosis only (PDx) and primary diagnosis plus all additional diagnoses (Any Dx) in infants aged <1 year and children aged 1-4 years in Western Australia, England and Scotland**

| ARI diagnosis                 | Western Australia |      |                | England           |       |                | Scotland          |      |                |
|-------------------------------|-------------------|------|----------------|-------------------|-------|----------------|-------------------|------|----------------|
|                               | Rate <sup>a</sup> |      | IRR (95% CI)   | Rate <sup>a</sup> |       | IRR (95% CI)   | Rate <sup>a</sup> |      | IRR (95% CI)   |
|                               | Any Dx            | PDx  |                | Any Dx            | PDx   |                | Any Dx            | PDx  |                |
| <b>&lt;1 year<sup>b</sup></b> |                   |      |                |                   |       |                |                   |      |                |
| Whooping cough                | 0.8               | 0.7  | 1.2 (1.0, 1.4) | 0.5               | 0.5   | 1.1 (1.0, 1.2) | 0.6               | 0.6  | 1.1 (0.9, 1.2) |
| Pneumonia                     | 5.6               | 4.1  | 1.4 (1.3, 1.5) | 3.8               | 2.9   | 1.3 (1.3, 1.3) | 2.6               | 1.9  | 1.3 (1.2, 1.4) |
| Bronchiolitis                 | 36.6              | 34.4 | 1.1 (1.0, 1.1) | 34.2              | 32.2  | 1.1 (1.1, 1.1) | 35.4              | 34.3 | 1.0 (1.0, 1.1) |
| Influenza                     | 1.6               | 1.3  | 1.3 (1.1, 1.4) | 0.4               | 0.3   | 1.4 (1.3, 1.5) | 0.9               | 0.7  | 1.3 (1.2, 1.5) |
| Unspecified ARI               | 3.9               | 2.6  | 1.5 (1.4, 1.6) | 5.9               | 4.6   | 1.3 (1.3, 1.3) | 3.6               | 2.8  | 1.3 (1.2, 1.4) |
| Bronchitis                    | 0.7               | 0.5  | 1.3 (1.1, 1.6) | 0.5               | 0.4   | 1.2 (1.1, 1.3) | 0.5               | 0.4  | 1.2 (1.1, 1.5) |
| Total ARI                     | 46.4              | 43.7 | 1.1 (1.0, 1.1) | 43.4              | 40.1  | 1.1 (1.1, 1.1) | 42.1              | 40.7 | 1.0 (1.0, 1.1) |
| <b>1-4 years<sup>c</sup></b>  |                   |      |                |                   |       |                |                   |      |                |
| Whooping cough                | 0.05              | 0.04 | 1.1 (0.7, 1.9) | 0.009             | 0.008 | 1.1 (0.9, 1.5) | 0.02              | 0.01 | 1.1 (0.7, 2.0) |
| Pneumonia                     | 4.3               | 3.7  | 1.2 (1.1, 1.2) | 2.8               | 2.5   | 1.1 (1.1, 1.1) | 2.3               | 2.1  | 1.1 (1.1, 1.1) |
| Bronchiolitis                 | 2.7               | 2.3  | 1.2 (1.1, 1.2) | 0.8               | 0.7   | 1.1 (1.1, 1.2) | 2.0               | 1.9  | 1.1 (1.0, 1.1) |
| Influenza                     | 0.6               | 0.4  | 1.3 (1.1, 1.4) | 0.2               | 0.2   | 1.3 (1.2, 1.4) | 0.3               | 0.2  | 1.2 (1.1, 1.4) |
| Unspecified ARI               | 3.0               | 2.2  | 1.4 (1.3, 1.5) | 5.1               | 4.2   | 1.2 (1.2, 1.2) | 3.9               | 3.3  | 1.2 (1.1, 1.2) |
| Bronchitis                    | 0.3               | 0.2  | 1.4 (1.2, 1.7) | 0.1               | 0.1   | 1.2 (1.1, 1.3) | 0.1               | 0.1  | 1.3 (0.0, 1.6) |
| Total ARI                     | 10.5              | 9.0  | 1.2 (1.1, 1.2) | 8.7               | 7.6   | 1.1 (1.1, 1.1) | 8.4               | 7.6  | 1.1 (0.0, 1.1) |

IRR, incidence rate ratio

<sup>a</sup>Rate is per 1000/child-years

<sup>b</sup>2001-2012 for Western Australia and Scotland; 2004-2012 for England

<sup>c</sup>2005-2012 for Western Australia and Scotland; 2008-2012 for England
